# Supplementary figures and images for: Unusual hydrogen-bonding differences in stereoisomeric 6-C-alkylated cyclodextrinsElectronic supplementary information (ESI) available: IR spectra of compounds 5 and 7 in CH2Cl2 solution. See http://www.rsc.org/suppdata/p1/b2/b207033m/
Source: Royal Society of Chemistry journal article supplement (doi:10.1039/b207033m), 2002-11-22

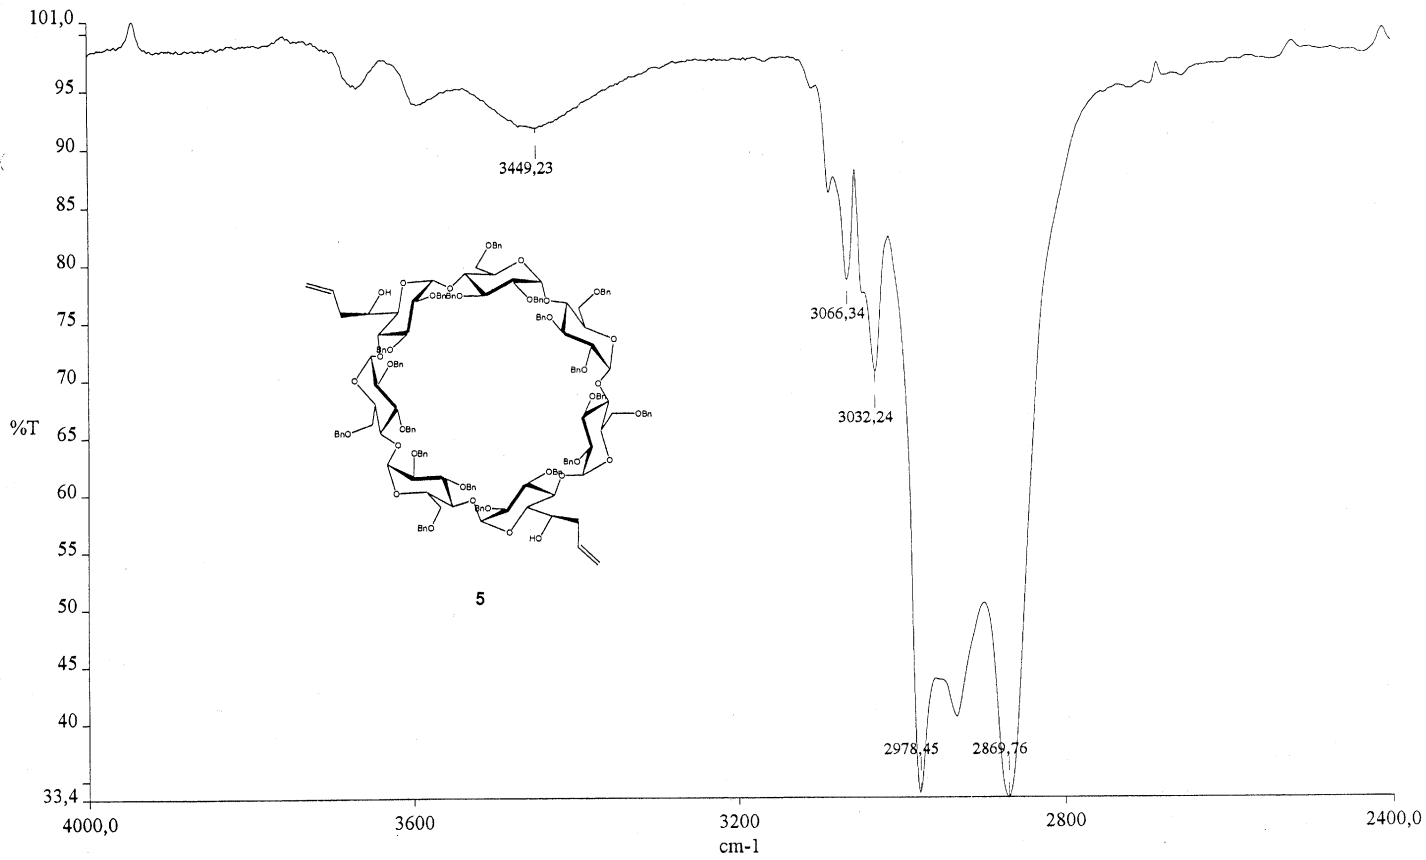

Supplement: b207033m-1.pdf [file b207033m-1.pdf]

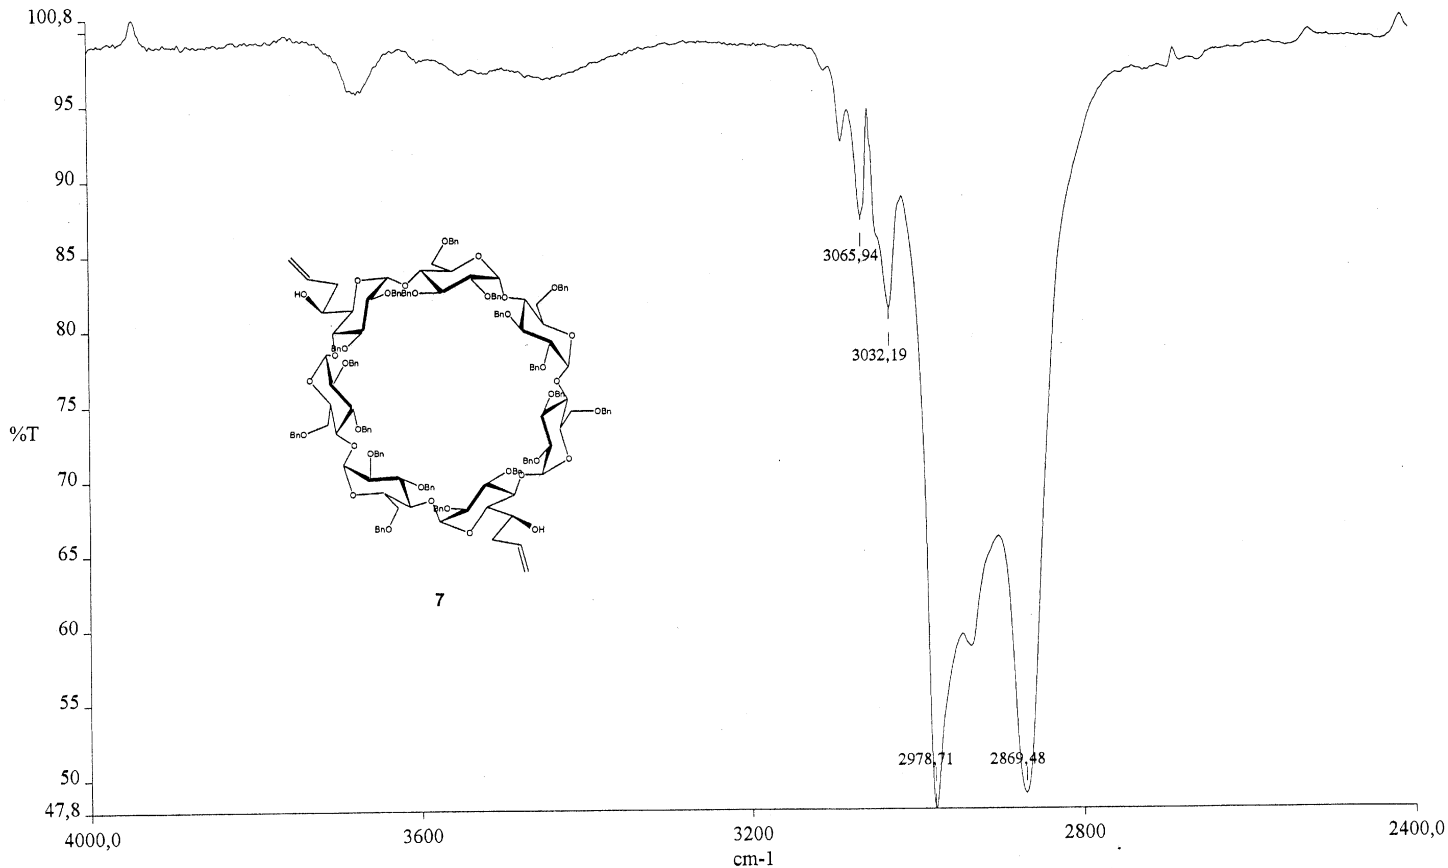

Supplement: b207033m-2.pdf [file b207033m-2.pdf]
